# Supplementary material for: Subduction and vertical coastal motions in the eastern Mediterranean
Source: Oxford University Press journal article supplement (doi:10.1093/gji/ggx307), 2017-08-06
Supplement: ggx307_Supp.pdf [file ggx307_Supp.pdf]

# Supplementary material: fit of synthetic to observed waveforms for waveform-modelled earthquakes

Andy Howell, James Jackson, Alex Copley, Dan M<sup>c</sup>Kenzie and Ed Nissen

Source parameters for each earthquake and sources for epicentres are listed in Table S1. A description of the features of the figures is found in Figure S1. Details of the inversion procedure are found in Section 2 of the main text.

| Year | Month | Day | Lon. (°) | Lat. (°) | Depth (km) | Strike (°) | Dip (°) | Rake (°) | $M_W$ | Epicentre |
|------|-------|-----|----------|----------|------------|------------|---------|----------|-------|-----------|
| 1990 | 07    | 18  | 29.533   | 37.032   | 10         | 96         | 49      | -119     | 5.4   | EHB       |
| 1994 | 11    | 13  | 29.058   | 36.946   | 8          | 285        | 48      | -94      | 5.4   | EHB       |
| 1995 | 05    | 29  | 32.244   | 35.058   | 15         | 258        | 28      | 150      | 5.2   | EHB       |
| 1995 | 02    | 23  | 32.269   | 35.060   | 11         | 221        | 15      | 120      | 5.9   | EHB       |
| 2003 | 05    | 03  | 31.514   | 36.898   | 128        | 356        | 35      | 152      | 5.4   | EHB       |
| 2005 | 01    | 23  | 29.708   | 35.894   | 34         | 228        | 61      | 0        | 5.7   | EHB       |
| 2007 | 10    | 29  | 29.342   | 36.908   | 20         | 275        | 37      | -107     | 5.3   | EHB       |
| 2009 | 06    | 19  | 28.4806  | 35.3441  | 36         | 245        | 43      | -64      | 5.8   | ISC       |
| 2009 | 07    | 01  | 25.5396  | 34.1472  | 7          | 268        | 23      | 76       | 6.5   | ISC       |
| 2009 | 12    | 22  | 31.5347  | 35.7334  | 44         | 313        | 27      | 90       | 5.2   | ISC       |
| 2010 | 04    | 24  | 26.0835  | 34.2407  | 8          | 67         | 58      | 66       | 5.4   | ISC       |
| 2011 | 04    | 01  | 26.5466  | 35.7317  | 66         | 138        | 69      | 11       | 6.1   | ISC       |
| 2012 | 06    | 10  | 28.9676  | 36.3847  | 31         | 201        | 83      | 0        | 6.2   | ISC       |
| 2012 | 07    | 09  | 28.9489  | 35.5969  | 51         | 43         | 79      | 2        | 5.7   | ISC       |
| 2012 | 09    | 12  | 24.0647  | 34.8285  | 23         | 280        | 19      | 70       | 5.5   | ISC       |
| 2013 | 06    | 15  | 25.0440  | 34.4507  | 20         | 284        | 2       | 95       | 6.2   | ISC       |
| 2013 | 06    | 16  | 25.1864  | 34.4242  | 18         | 182        | 8       | 343      | 6.0   | ISC       |
| 2013 | 12    | 28  | 31.3184  | 36.0497  | 46         | 293        | 28      | 75       | 5.9   | ISC       |
| 2015 | 04    | 16  | 26.82    | 35.14    | 20         | 344        | 68      | 103      | 6.1   | PDE       |
| 2015 | 06    | 09  | 26.79    | 35.04    | 16         | 23         | 56      | -117     | 5.3   | PDE       |

Table S1: Dates and source parameters of earthquakes in the eastern Mediterranean obtained by inversion body waveforms. Moment magnitudes ( $M_W$ ) were calculated using the formula of (*Hanks and Kanamori, 1979*). Epicentres are from the EHB catalogue (*Engdahl et al., 1998*) for earthquakes before 2009 and the reviewed ISC catalogue (*International Seismological Centre, 2016*) between 2009 and January 2014. For earthquakes since February 2014 we use USGS PDE epicentres.

# 1990 July 18 SW Turkey Mw 5.4

96/49/241/10/1.271E17

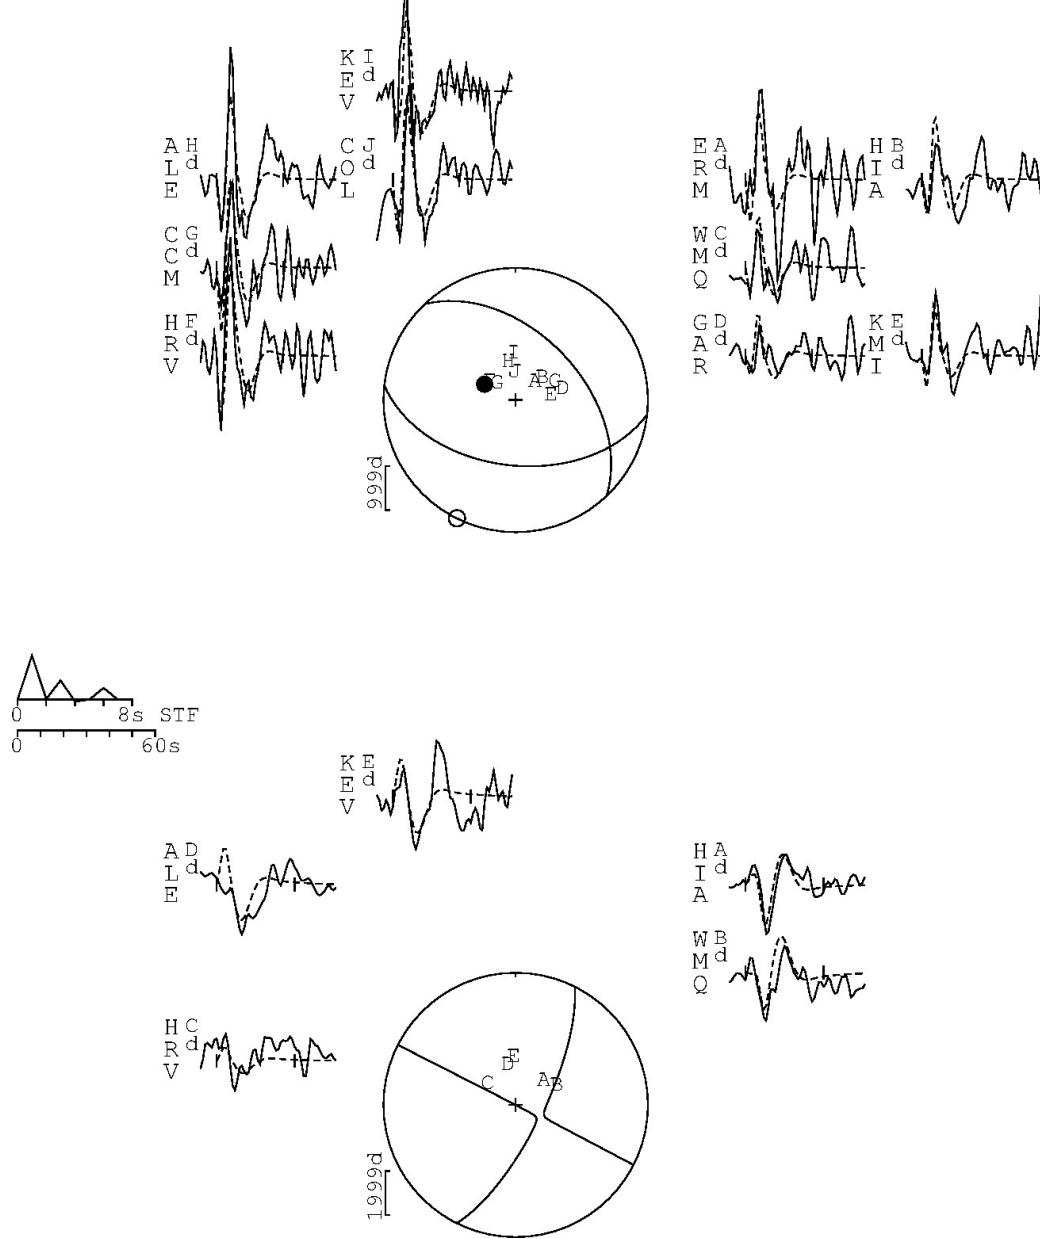

Figure S1: Fit of synthetic to observed waveforms for the 1990 July 18 SW Turkey  $M_W$  5.4 earthquake. The source parameters for this earthquake are listed in Table S1. The event header (below the earthquake header at top) shows the strike, dip, rake, centroid depth and scalar seismic moment (in Nm) of the minimum misfit solution. The top focal sphere shows the lower hemisphere stereographic projection of the P-waveform nodal planes, and the positions of the seismic stations used in the inversion. The lower panel shows the  $SH$  focal sphere. Capital letters next to the station codes correspond to the position on the focal sphere, ordered clockwise by azimuth, starting at north. Solid and dashed lines show the observed and synthetic waveforms respectively. The inversion window is marked by vertical lines on each waveform. The source-time function (STF) is shown, with the time scale for the waveforms below it. The amplitude scales for the waveforms are shown below each focal sphere. The P- and T-axes within the P-waveform focal sphere are shown by a solid and an open circle, respectively.

1994 November 13 SW Turkey  $M_W$  5.4  
285/48/266/8/1.1E17

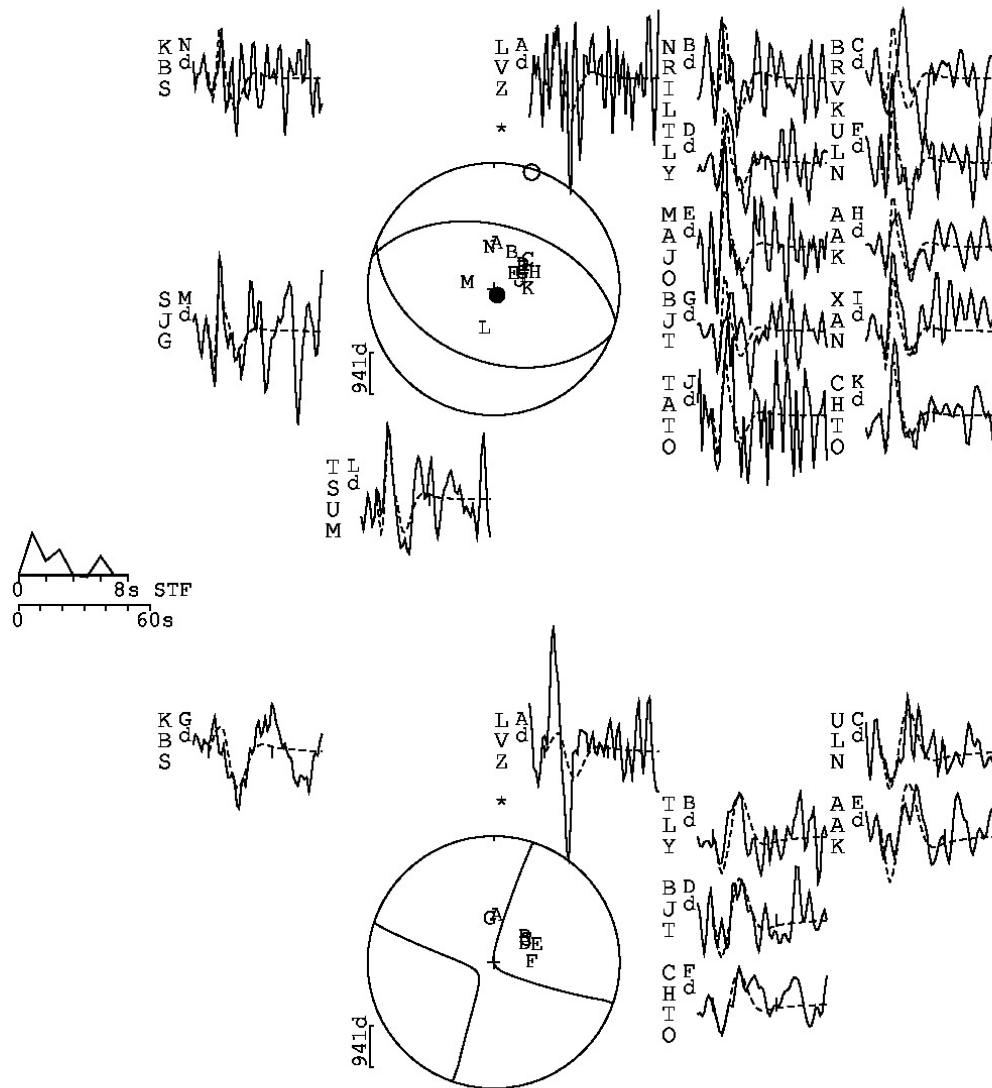

Figure S2: Fit of synthetic to observed waveforms for the 1994 November 13 SW Turkey  $M_W$  5.4 earthquake. The source parameters for this earthquake are listed in Table S1 and the main features of the figure are the same as for Figure S1.

# 1995 May 29 Cyprus Mw 5.2

258/28/150/15/6.346E16

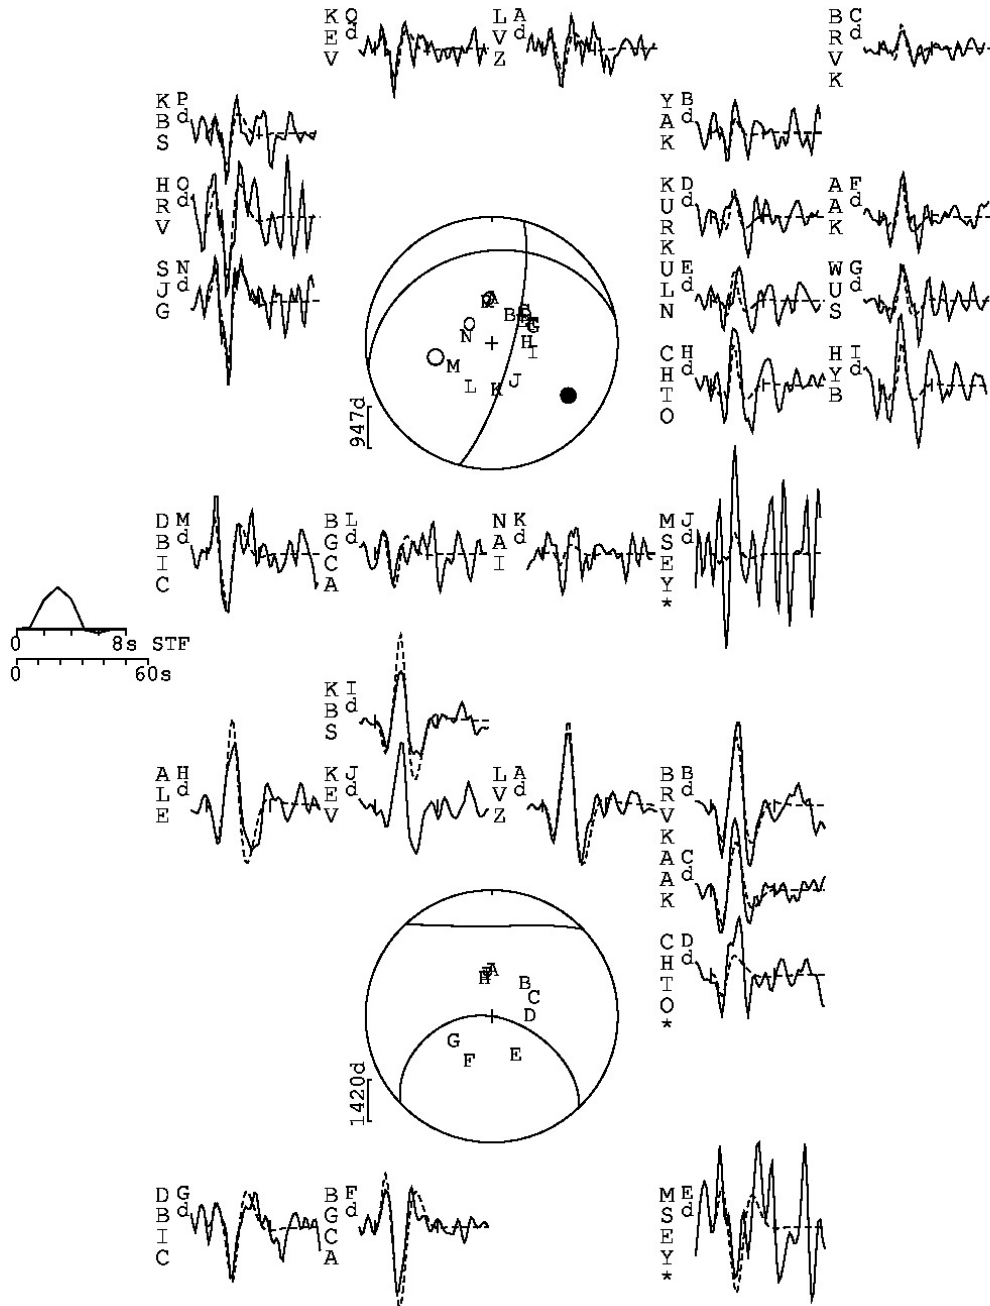

Figure S3: Fit of synthetic to observed waveforms for the 1995 May 29 Cyprus  $M_W$  5.2 earthquake. The source parameters for this earthquake are listed in Table S1 and the main features of the figure are the same as for Figure S1.

# 1995 May 29 Cyprus Mw 5.2

258/28/150/15/6.346E16



Figure S4: Fit of synthetic to observed waveforms for the 1995 February 23 Methoni  $M_W$  5.9 earthquake. The source parameters for this earthquake are listed in Table S1 and the main features of the figure are the same as for Figure S1.

# 1995 May 29 Cyprus Mw 5.2

258/28/150/15/6.346E16



Figure S5: Fit of synthetic to observed waveforms for the 2003 May 03 Anaximander mountains  $M_W$  5.4 earthquake. The source parameters for this earthquake are listed in Table S1 and the main features of the figure are the same as for Figure S1.

# 2005 Jan 23 Anaximander Mountains Mw 5.7

228/61/0/34/3.045E17

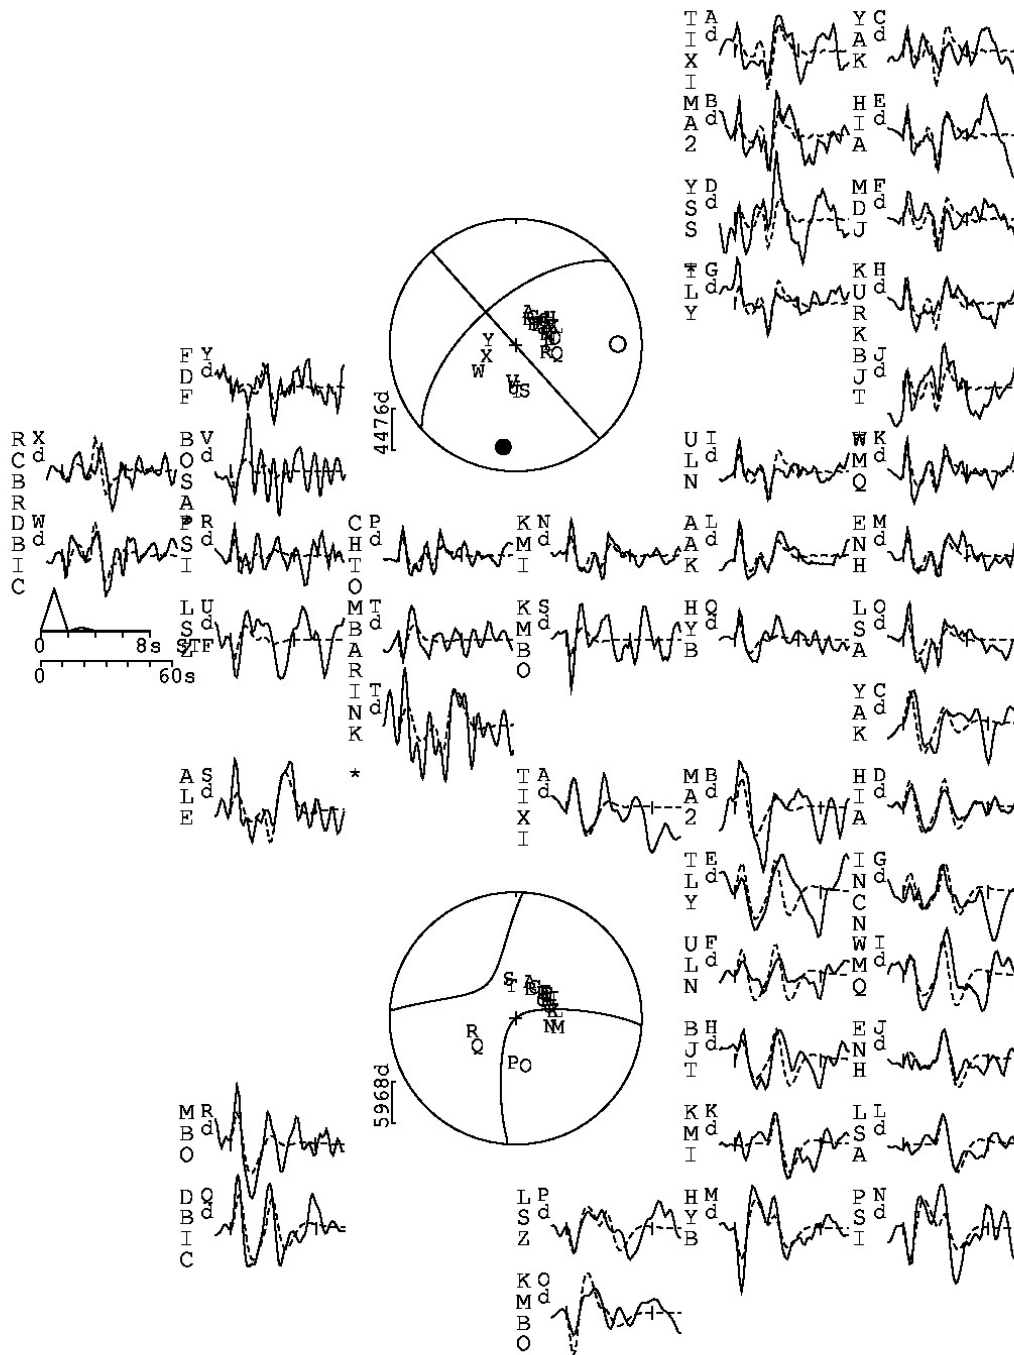

Figure S6: Fit of synthetic to observed waveforms for the 2005 January 23 S Turkey  $M_W$  5.7 earthquake. The source parameters for this earthquake are listed in Table S1 and the main features of the figure are the same as for Figure S1.

2007 October 29 SW Turkey Mw 5.3  
 275/37/253/9/7.736E16

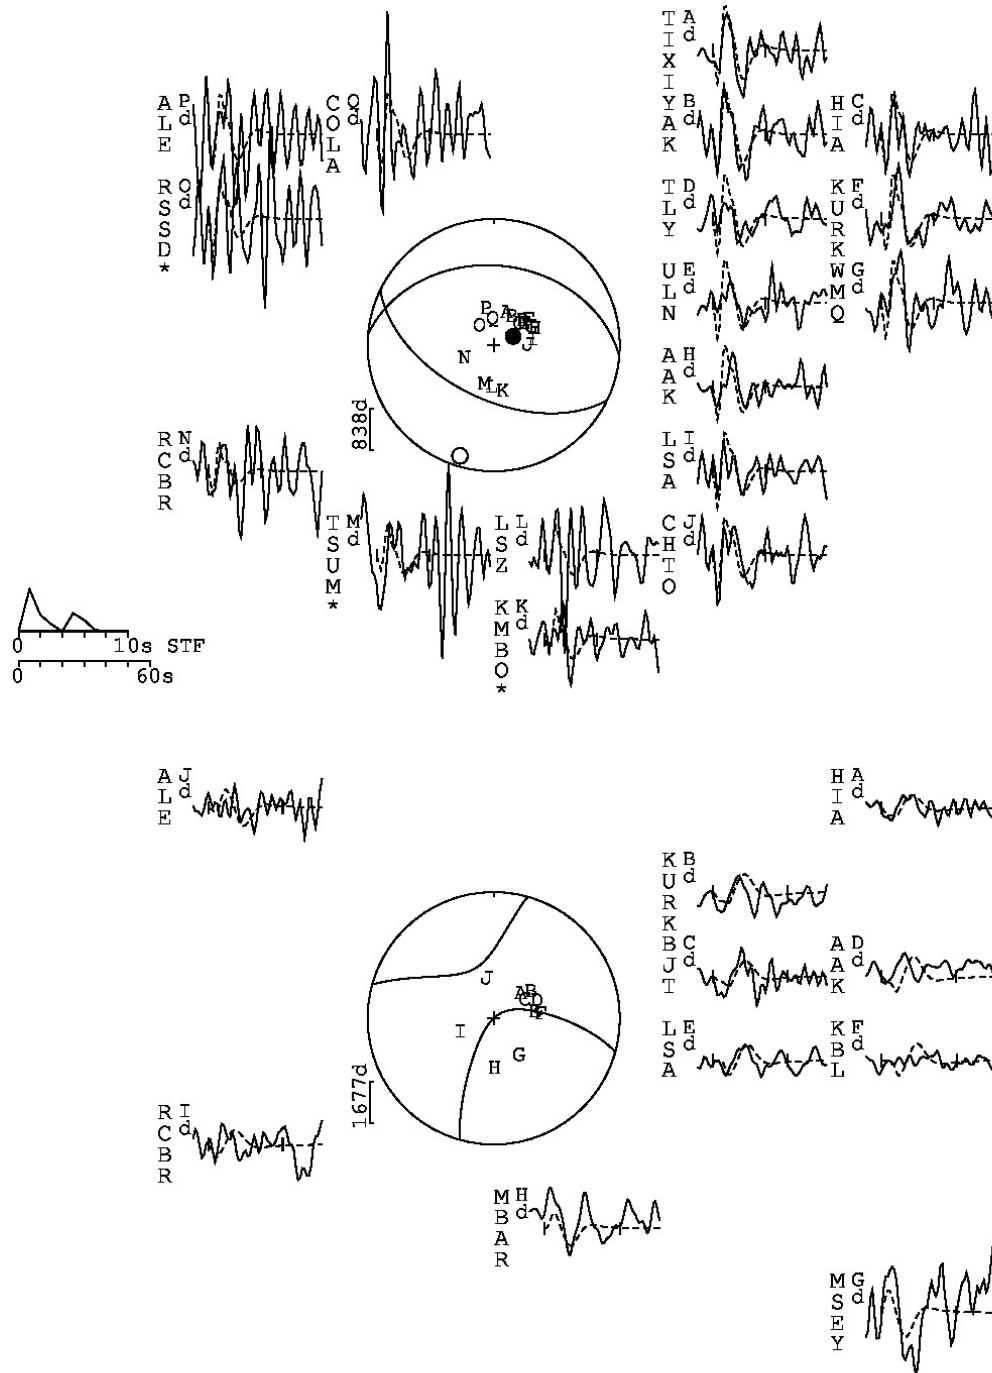

Figure S7: Fit of synthetic to observed waveforms for the 2007 October 29 Methoni  $M_W$  5.3 earthquake. The source parameters for this earthquake are listed in Table S1 and the main features of the figure are the same as for Figure S1.



# 2009 June 19 S of Rhodes Mw 5.8

245/43/296/36/4.463E17

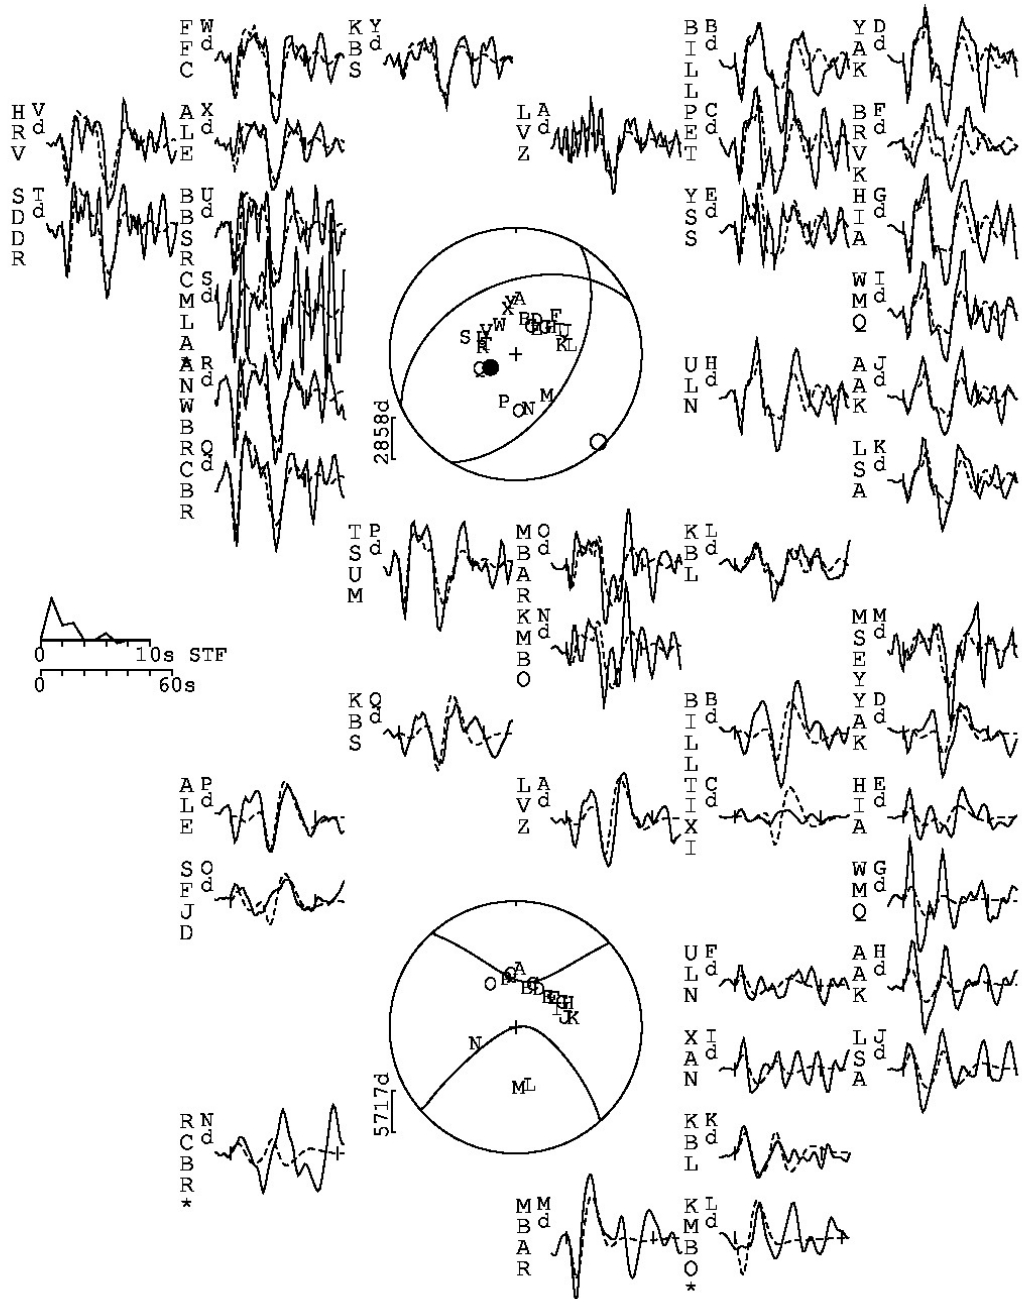

Figure S8: Fit of synthetic to observed waveforms for the 2009 June 19 S of Rhodes  $M_W$  5.8 earthquake. The source parameters for this earthquake are listed in Table S1 and the main features of the figure are the same as for Figure S1.

## 2009 July 01 Crete Mw 6.5 268/23/76/16.975E18

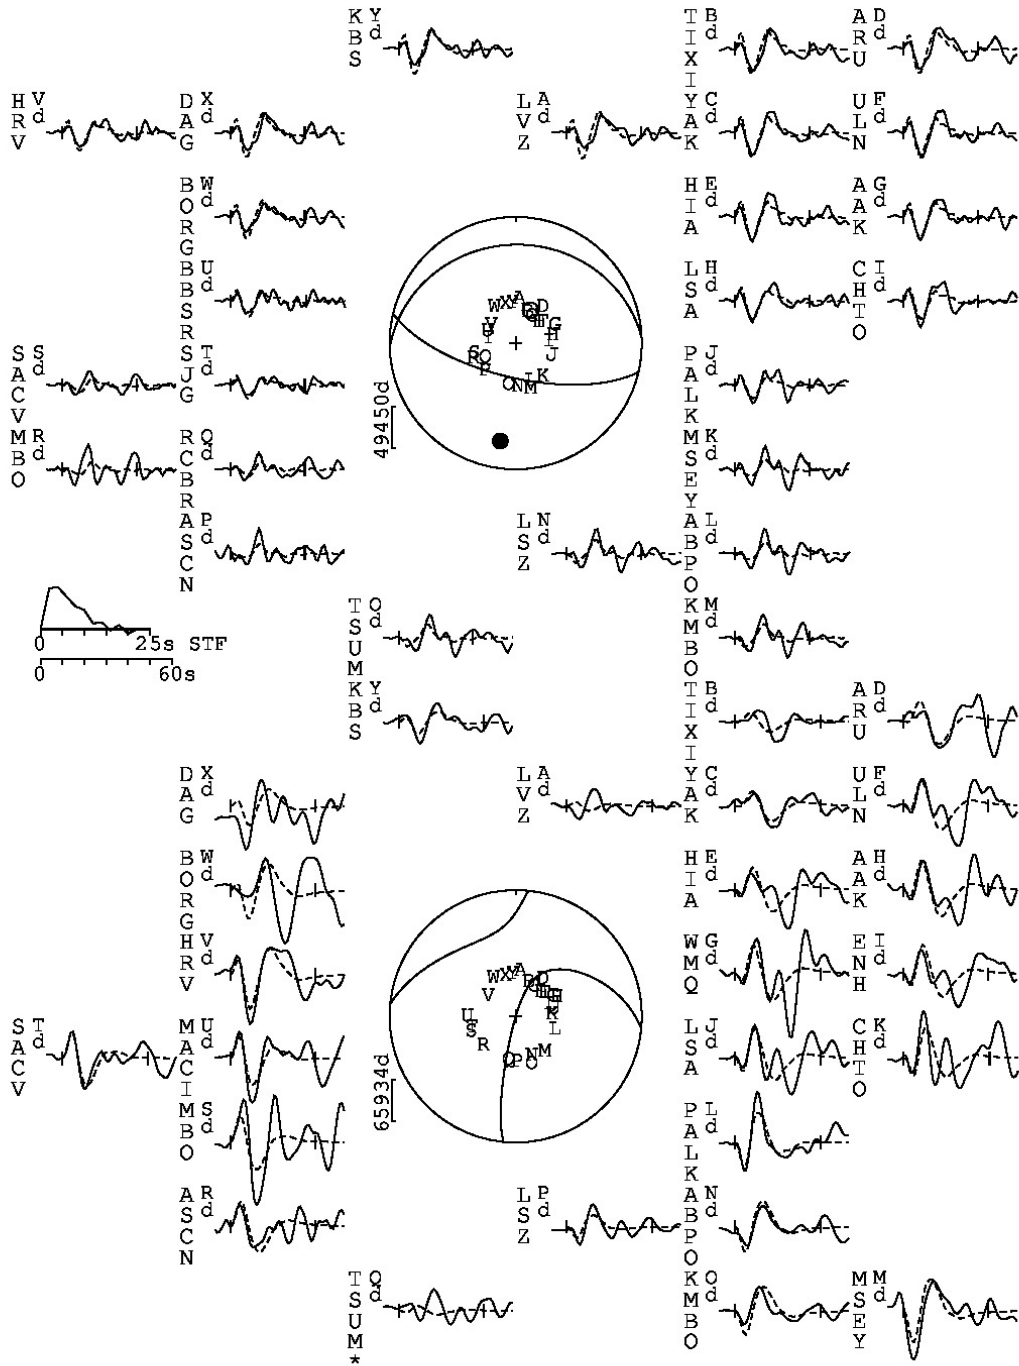

Figure S9: Fit of synthetic to observed waveforms for the 2009 July 01 Crete  $M_W$  6.5 earthquake. The source parameters for this earthquake are listed in Table S1 and the main features of the figure are the same as for Figure S1.

2009 December 22 Florence Rise Mw 5.2  
313/27/90/44/6.786E16

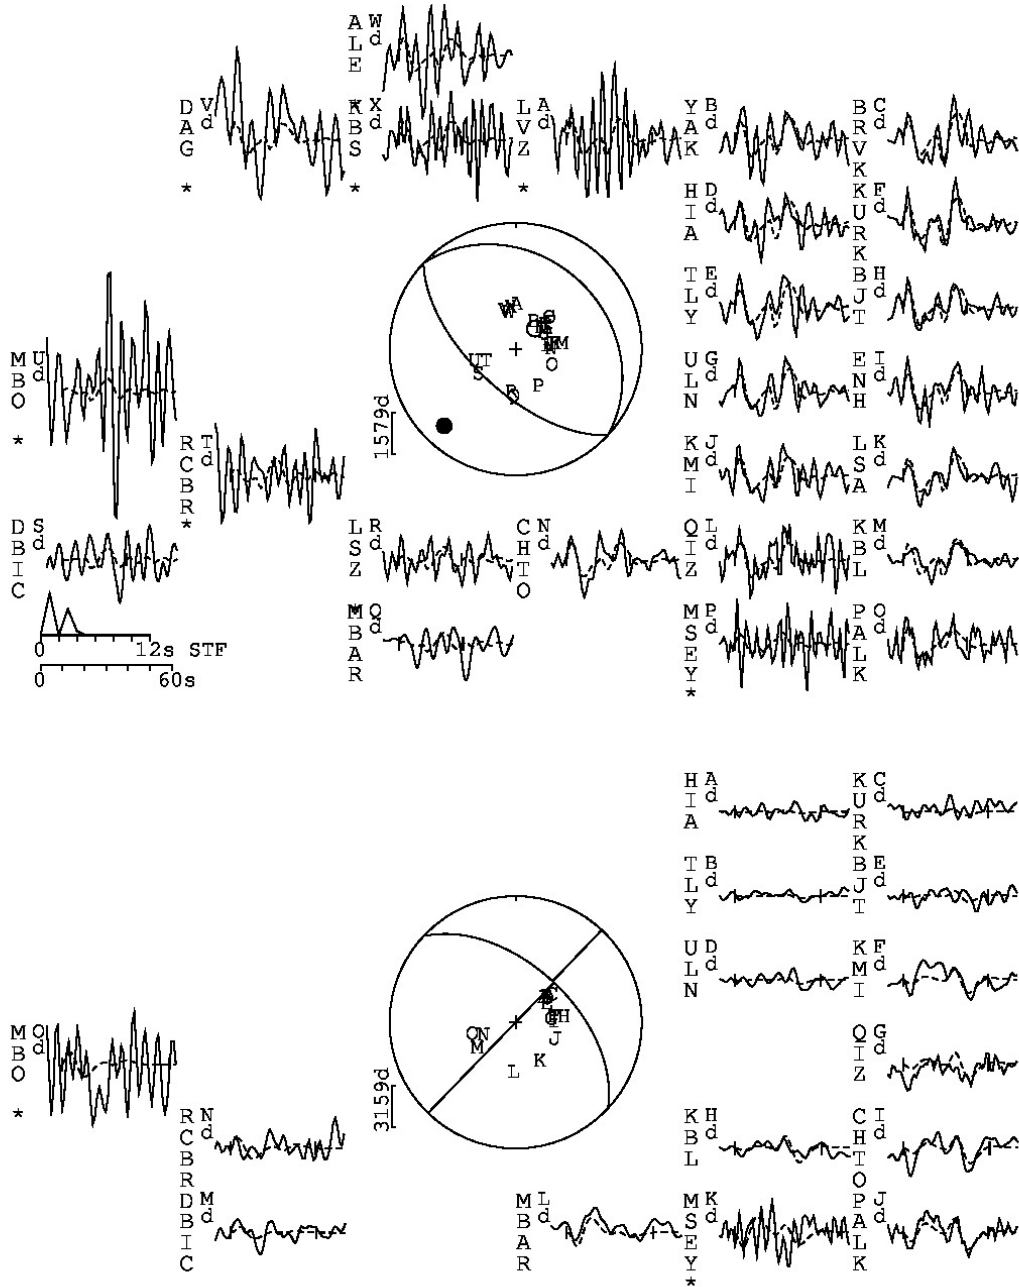

Figure S10: Fit of synthetic to observed waveforms for the 2009 December 22 Zakynthos  $M_W$  5.2 earthquake. The source parameters for this earthquake are listed in Table S1 and the main features of the figure are the same as for Figure S1.

## 2010 April 24 Crete Mw 5.3 67/58/66/8/8.414E16

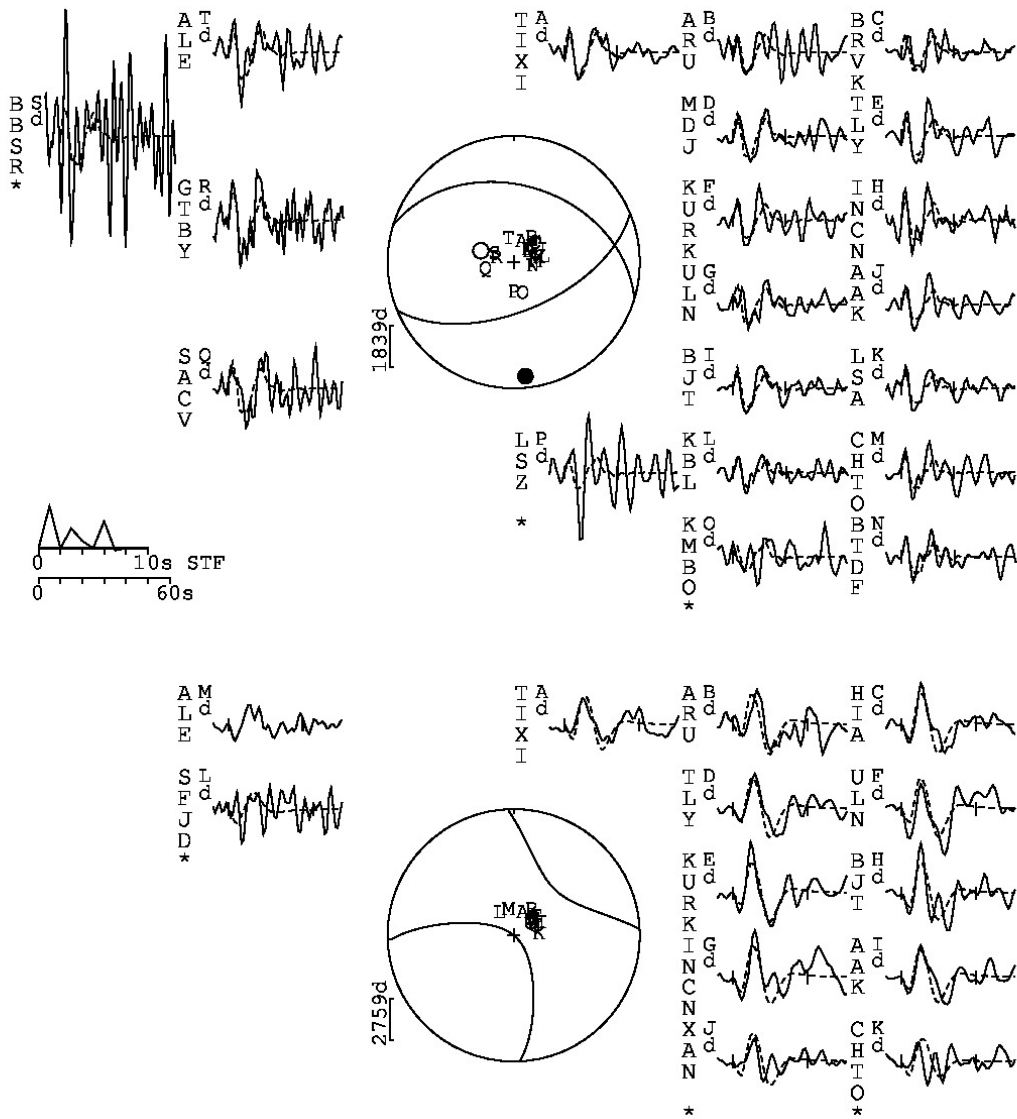

Figure S11: Fit of synthetic to observed waveforms for the 2010 April 24 Florence Rise  $M_W$  5.4 earthquake. The source parameters for this earthquake are listed in Table S1 and the main features of the figure are the same as for Figure S1.

2011 April 01 Mw 6.1 Karpathos  
138/69/11/66/1.548E18

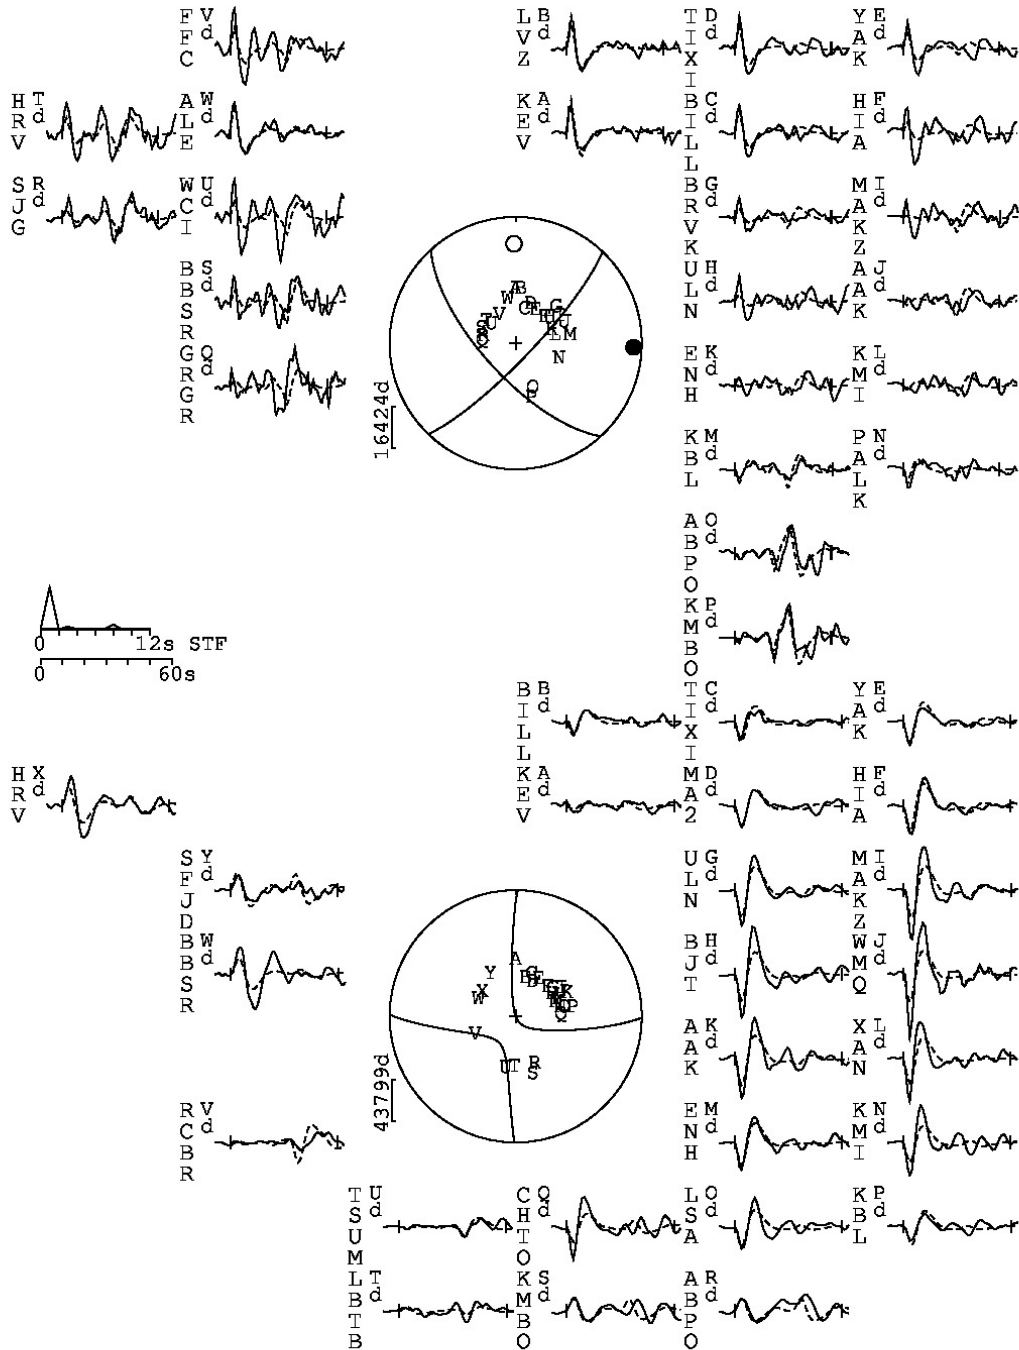

Figure S12: Fit of synthetic to observed waveforms for the 2011 April 01 Crete  $M_W$  6.1 earthquake. The source parameters for this earthquake are listed in Table S1 and the main features of the figure are the same as for Figure S1.

2012 June 10 Rhodes Basin Mw 6.2  
201/83/0/31/2.062E18

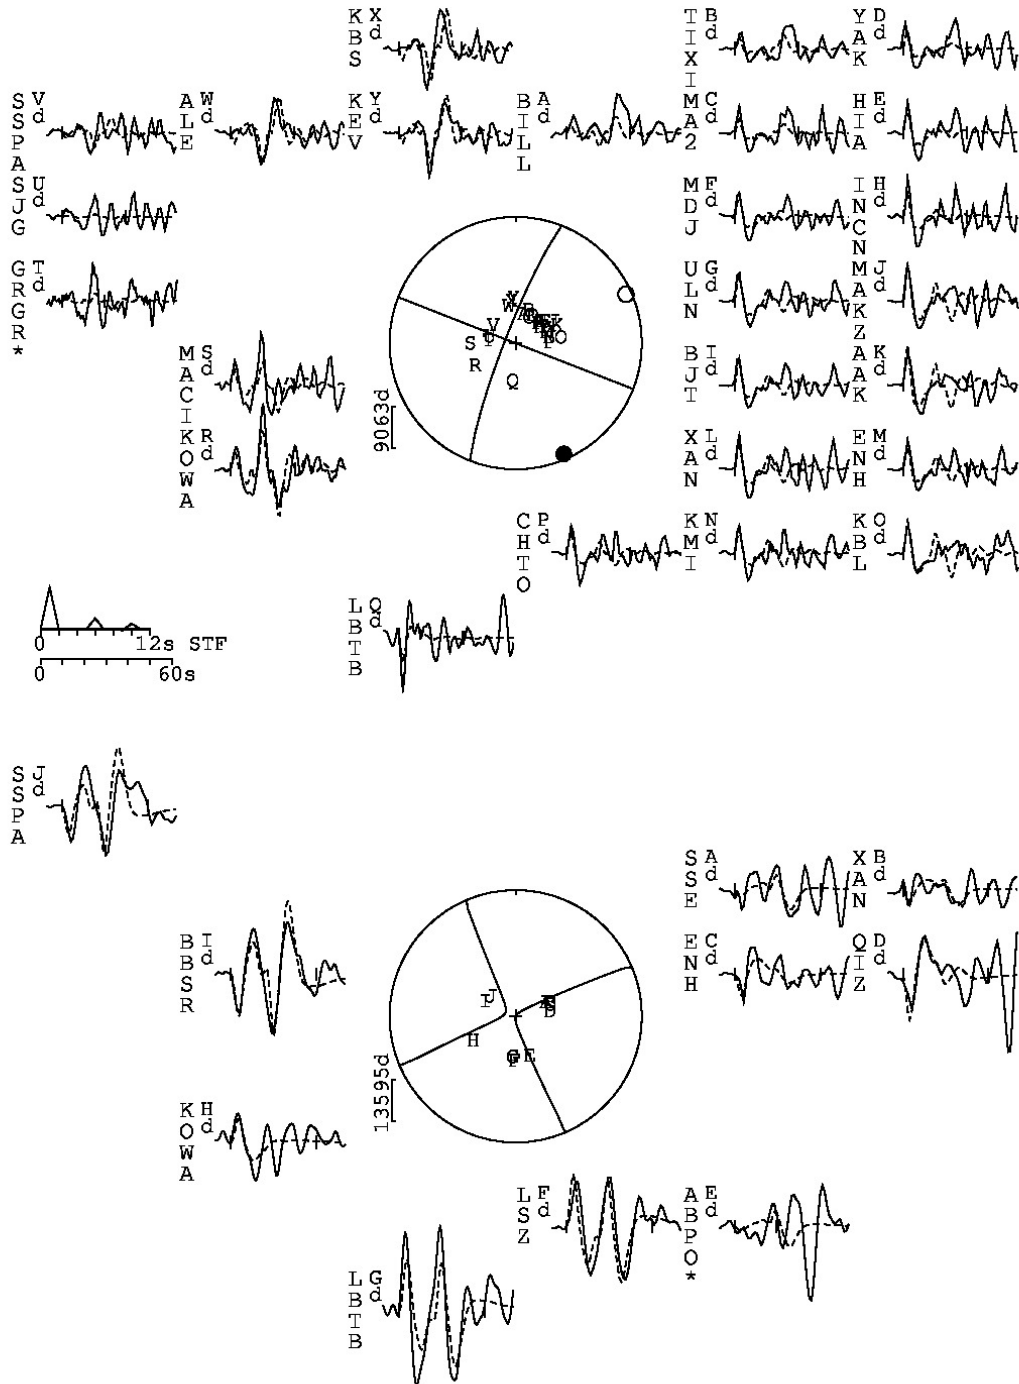

Figure S13: Fit of synthetic to observed waveforms for the 2012 June 10 Karpachos  $M_W$  6.2 earthquake. The source parameters for this earthquake are listed in Table S1 and the main features of the figure are the same as for Figure S1.

2012 Jul 09 13:55 Rhodes Basin  
43/79/2/51/3.65E17

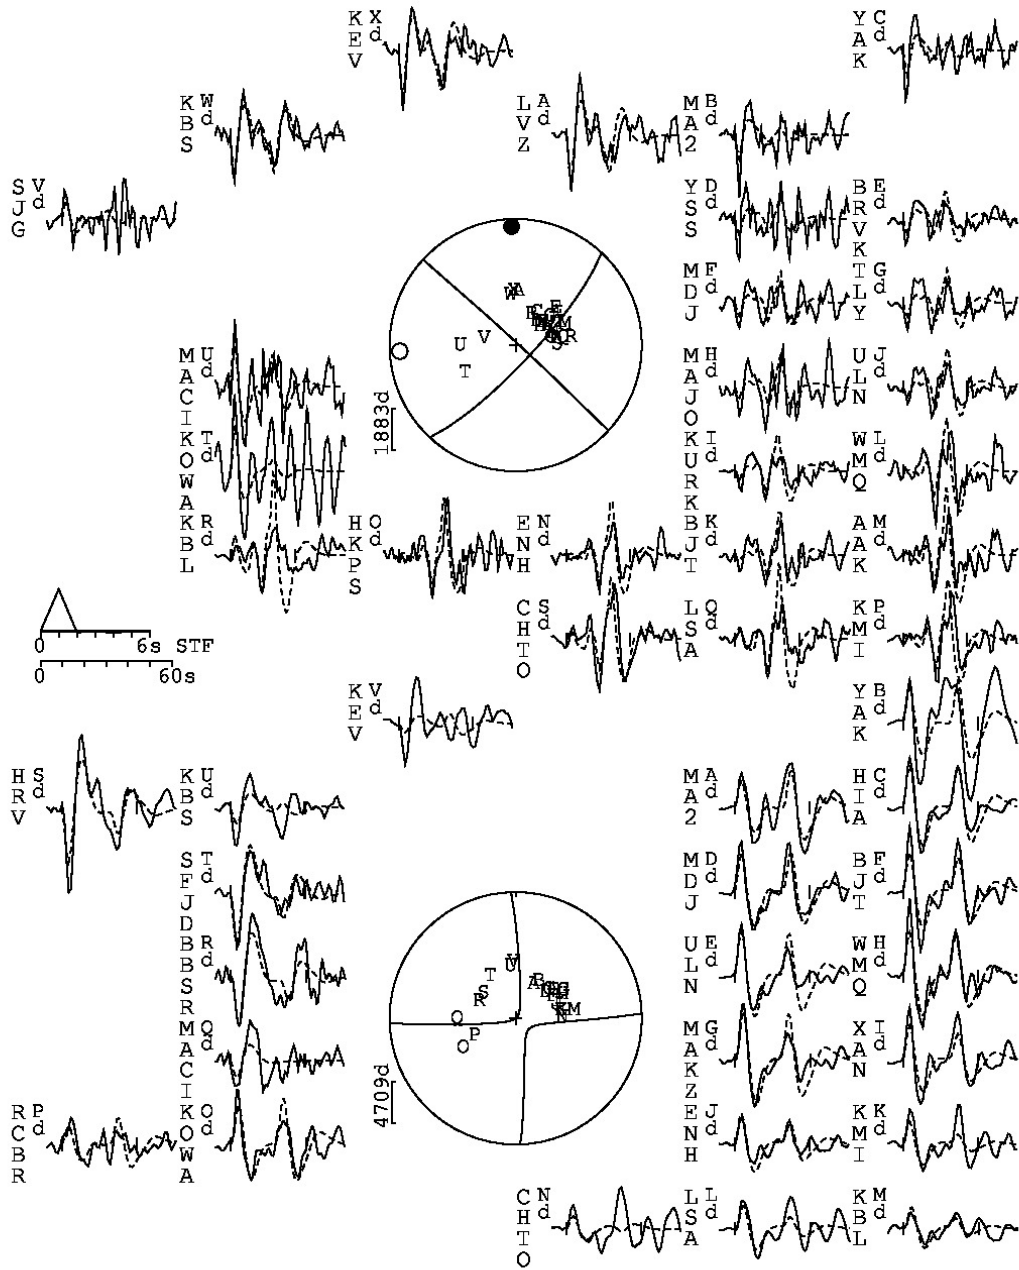

Figure S14: Fit of synthetic to observed waveforms for the 2012 July 09 Southern Greece  $M_W$  5.7 earthquake. The source parameters for this earthquake are listed in Table S1 and the main features of the figure are the same as for Figure S1.

2012 September 12 Crete Mw 5.5  
280/19/70/23/1.508E17

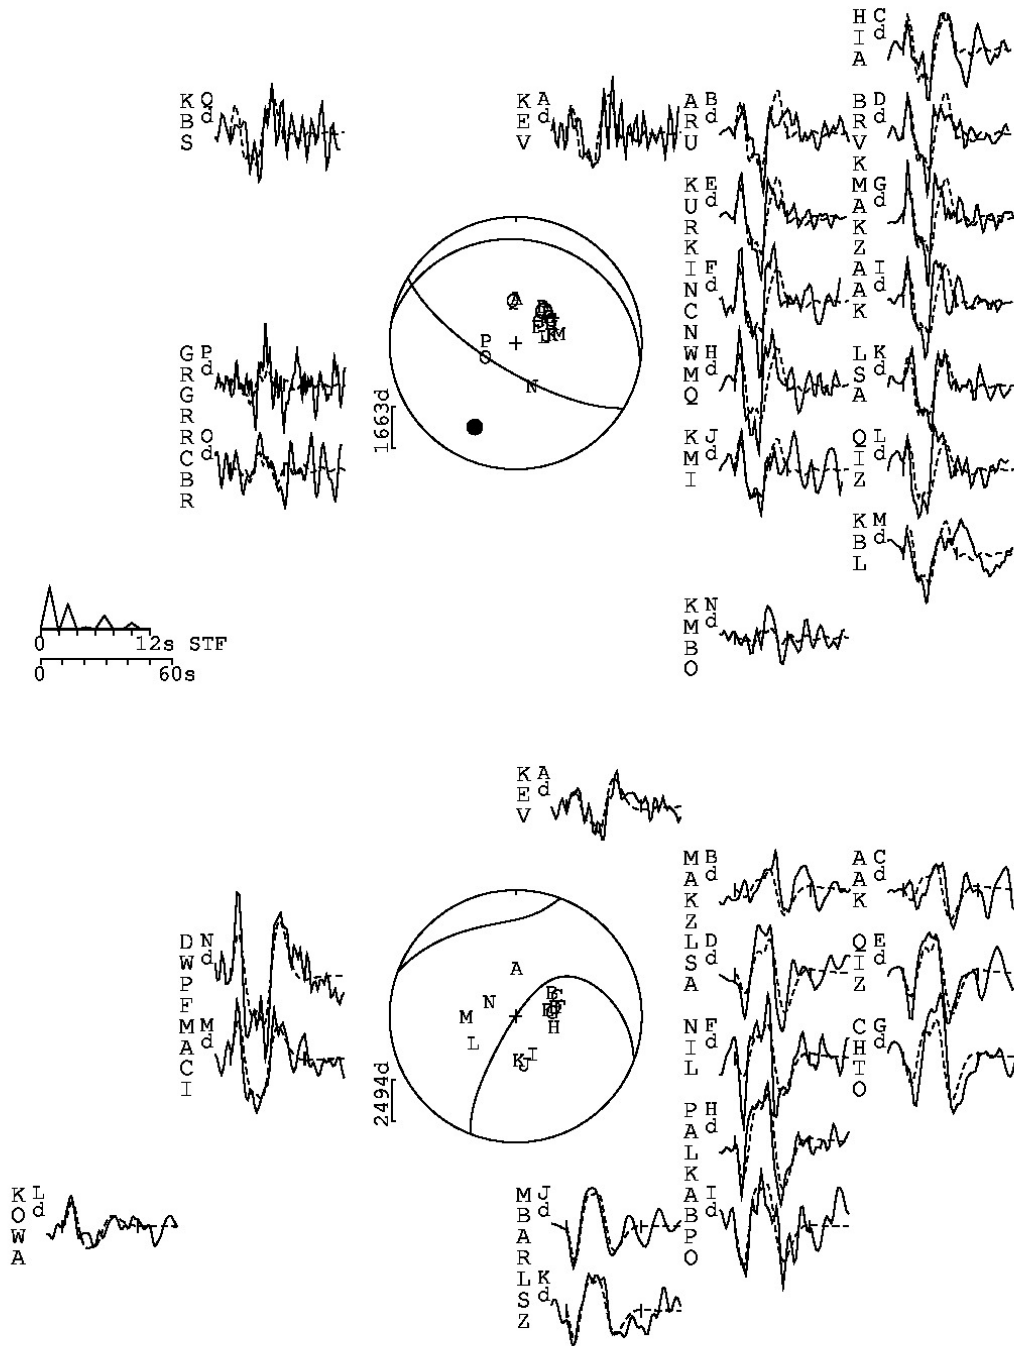

Figure S15: Fit of synthetic to observed waveforms for the 2012 September 12 Rhodes Basin  $M_W$  5.5 earthquake. The source parameters for this earthquake are listed in Table S1 and the main features of the figure are the same as for Figure S1.



## 2013 June 15 Crete Mw 6.2 284/2/95/20/2.477E18

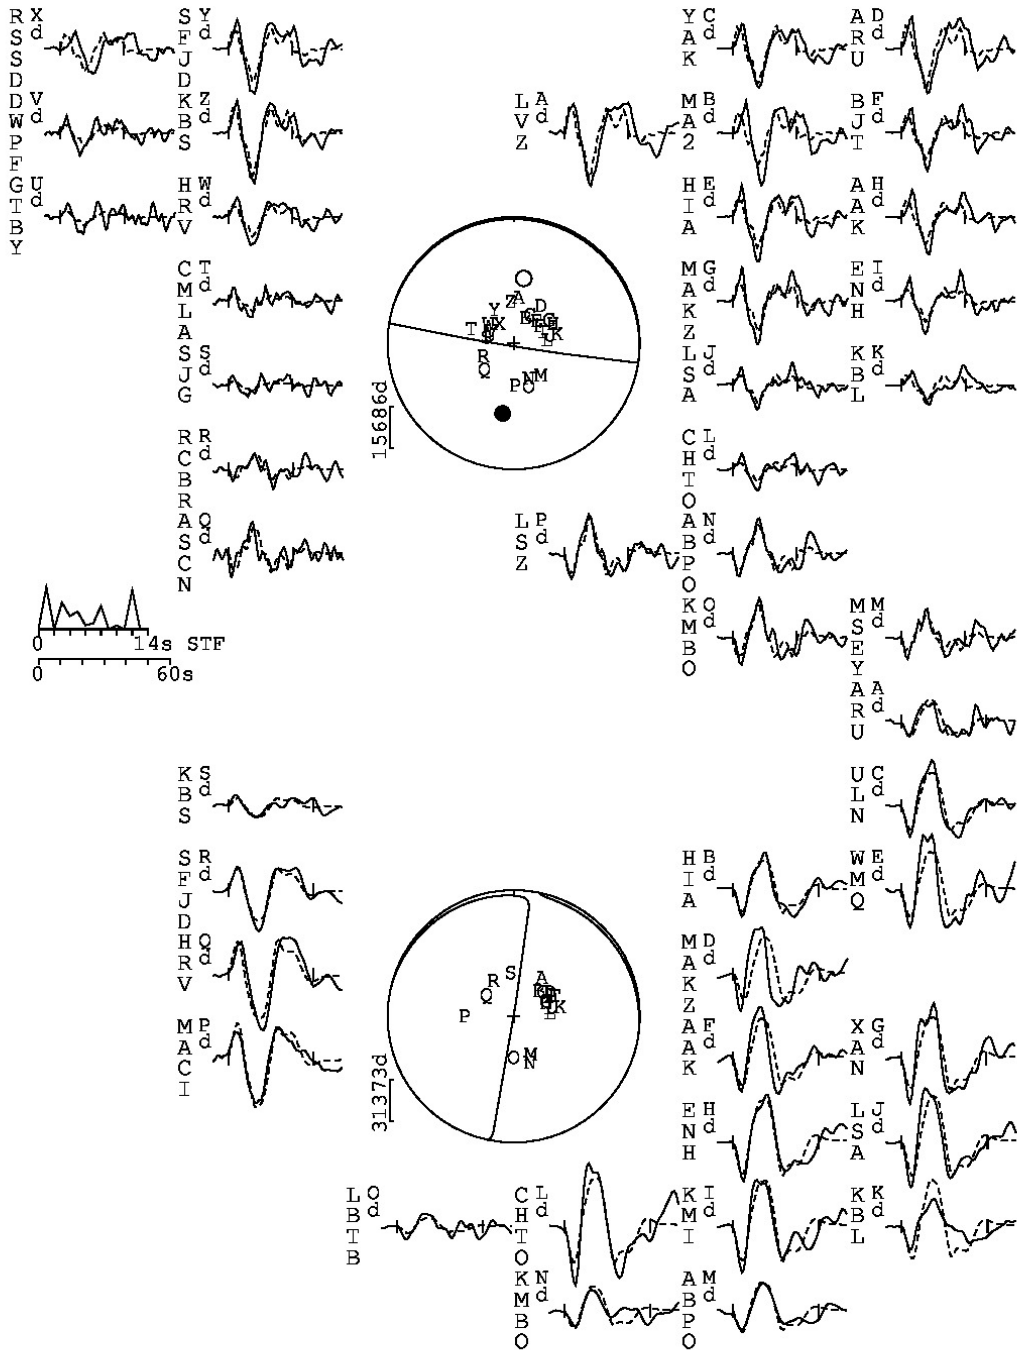

Figure S16: Fit of synthetic to observed waveforms for the 2013 June 15 Rhodes Basin  $M_W$  6.2 earthquake. The source parameters for this earthquake are listed in Table S1 and the main features of the figure are the same as for Figure S1.

## 2013 June 16 Crete Mw 6.0 182/8/343/18/1.41E18

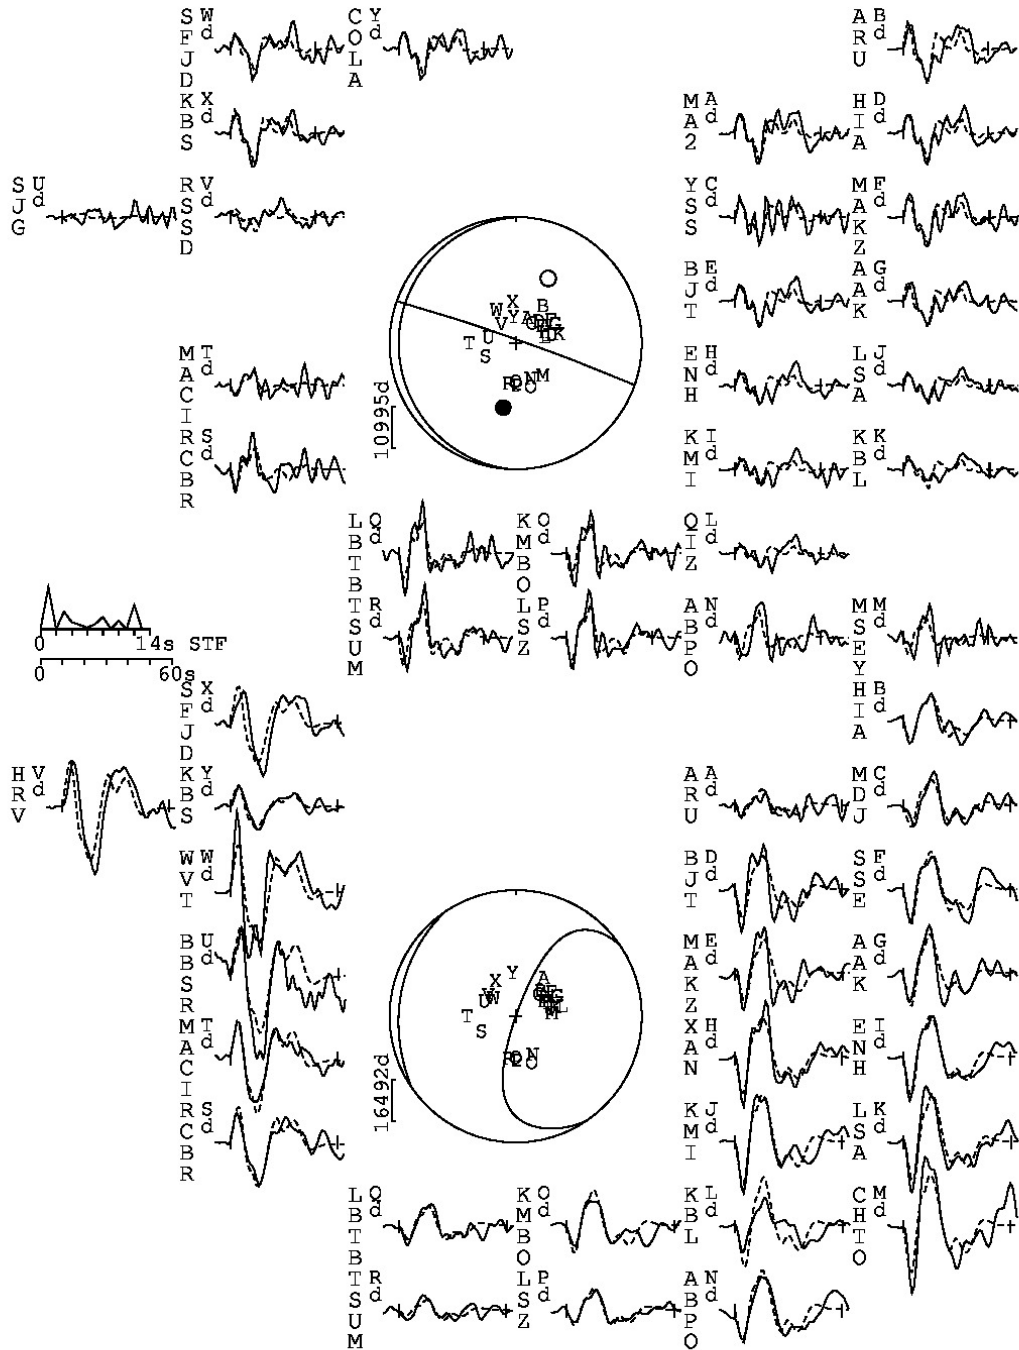

Figure S17: Fit of synthetic to observed waveforms for the 2013 June 16 Crete  $M_W$  6.0 earthquake. The source parameters for this earthquake are listed in Table S1 and the main features of the figure are the same as for Figure S1.

2013 December 28 Florence Rise Mw 5.9  
293/28/75/46/7.336E17

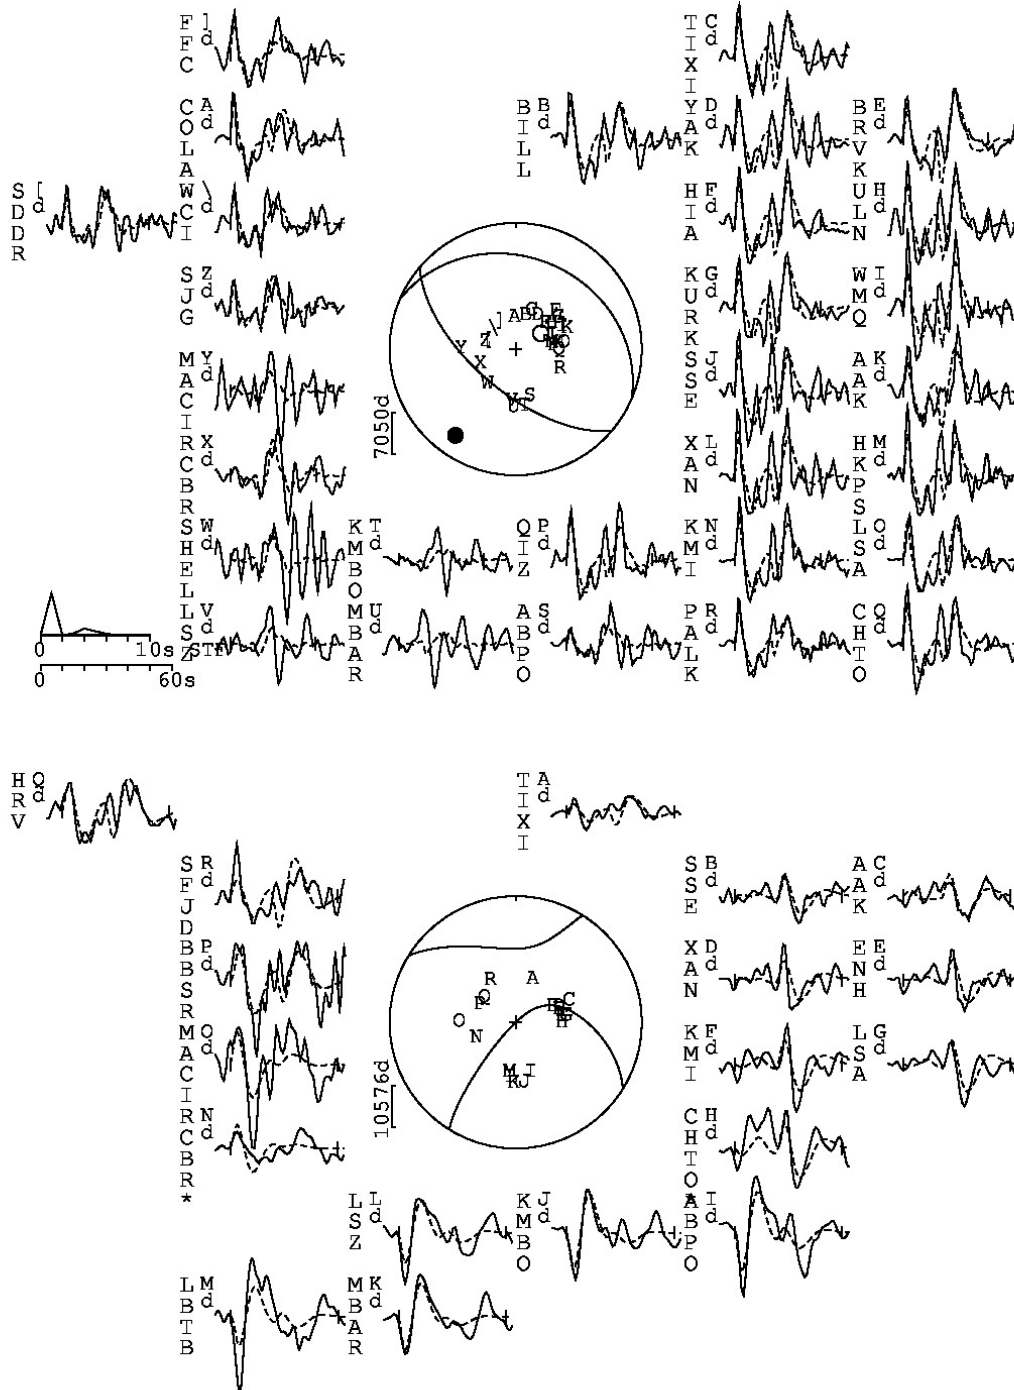

Figure S18: Fit of synthetic to observed waveforms for the 2013 December 28 Crete  $M_W$  5.9 earthquake. The source parameters for this earthquake are listed in Table S1 and the main features of the figure are the same as for Figure S1.

2015 Apr 16 Karpathos Mw6.1  
344/68/103/20/1.451E18

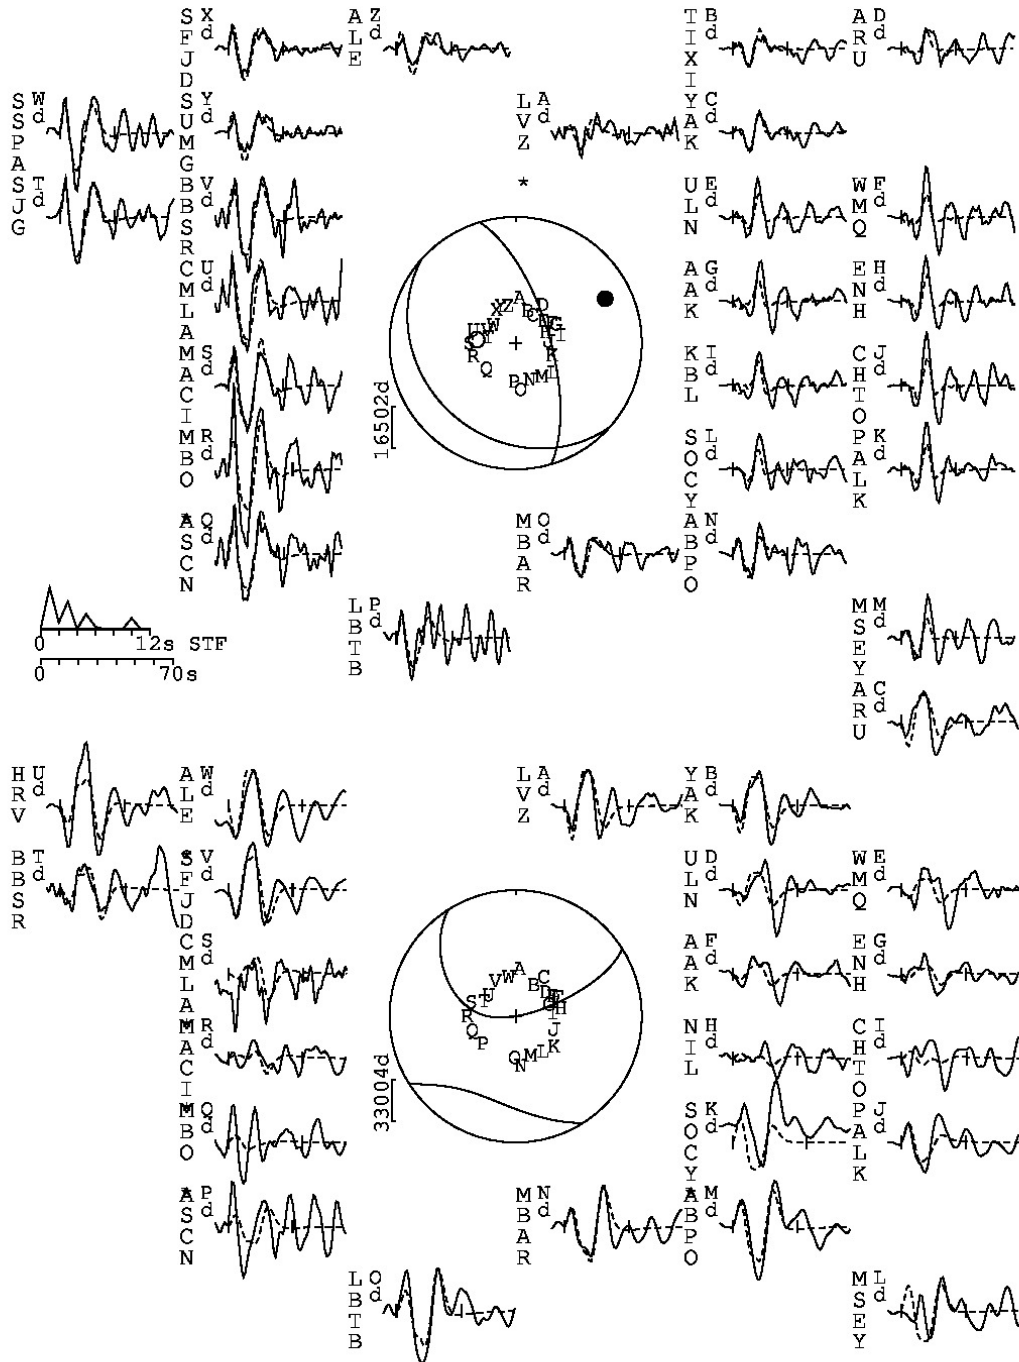

Figure S19: Fit of synthetic to observed waveforms for the 2015 April 16 Crete  $M_W$  6.1 earthquake. The source parameters for this earthquake are listed in Table S1 and the main features of the figure are the same as for Figure S1.

**2015 June 9 Karpathos Mw5.3**  
 23/56/253/16/9.667E16

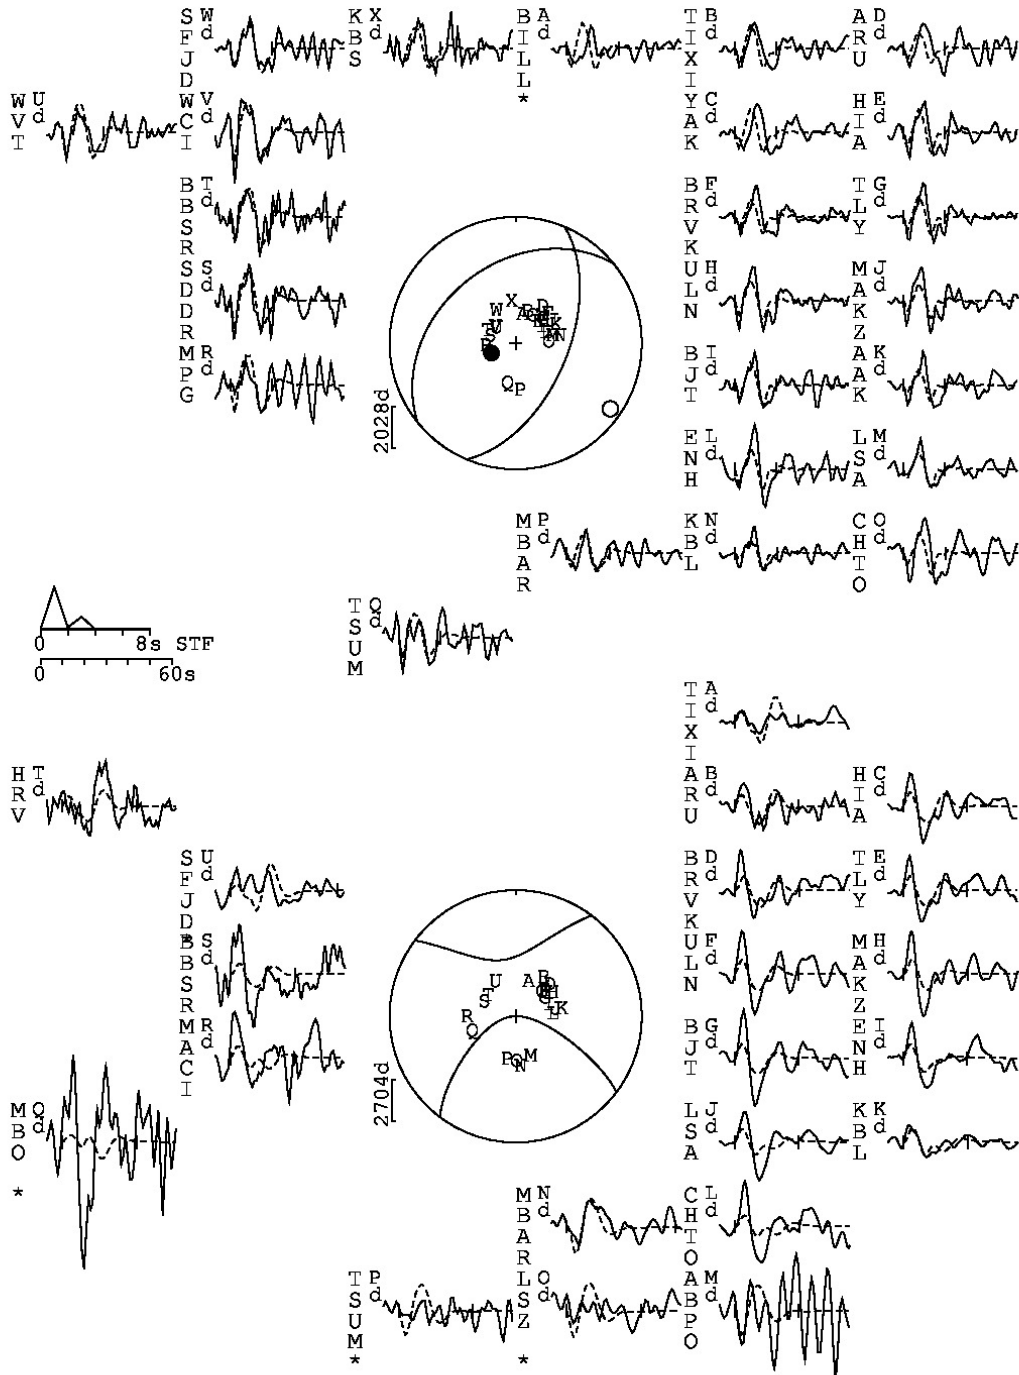

Figure S20: Fit of synthetic to observed waveforms for the 2015 June 09 Crete  $M_W$  5.3 earthquake. The source parameters for this earthquake are listed in Table S1 and the main features of the figure are the same as for Figure S1.

## References

- Engdahl, E. R., R. van der Hilst, and R. Buland, Global teleseismic earthquake relocation with improved travel times and procedures for depth determination, *Bull. Seism. Soc. Am.*, 88, 722–743, 1998.
- Hanks, T. C., and H. Kanamori, A moment magnitude scale, *J. Geophys. Res. Solid Earth*, 84(B5), 2348–2350, 1979.
- International Seismological Centre, On-line Bulletin, 2016.
